# Supplementary material for: Green Tea Catechin, Epigallocatechin Gallate, Suppresses Signaling by the dsRNA Innate Immune Receptor RIG-I
Source: PubMed Central journal article supplement (PMC2943919; doi:10.1371/journal.pone.0012878), 2010-09-22

Figure S3

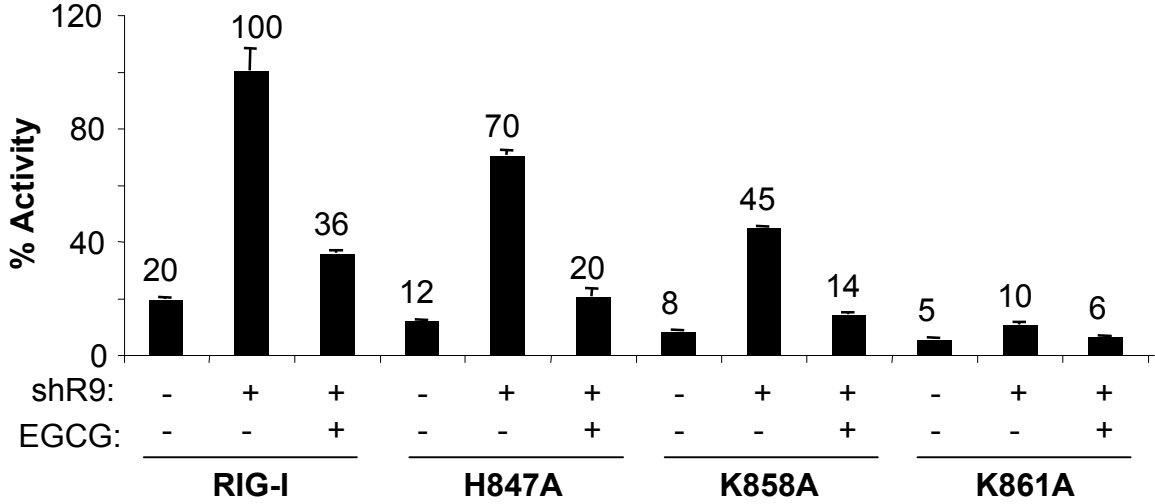

Supplement: pone.0012878.s003.pdf [file pone.0012878.s003.pdf]
