# Supplementary material for: Green Tea Catechin, Epigallocatechin Gallate, Suppresses Signaling by the dsRNA Innate Immune Receptor RIG-I
Source: PubMed Central journal article supplement (PMC2943919; doi:10.1371/journal.pone.0012878), 2010-09-22
Supplement: pone.0012878.s004.pdf [file pone.0012878.s004.pdf]

Figure S4

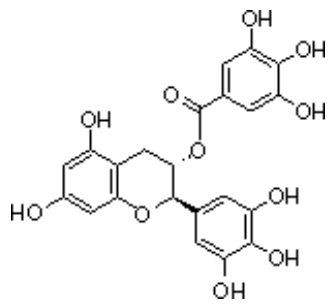

Gallocatechin gallate  
(GCG)

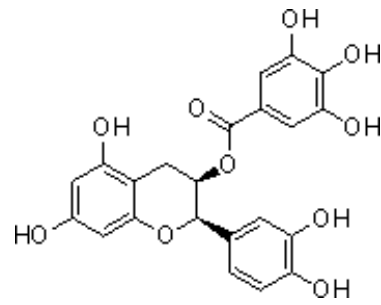

Epicatechin gallate  
(ECG)

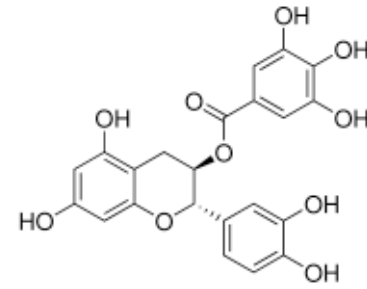

Catechin gallate  
(CG)

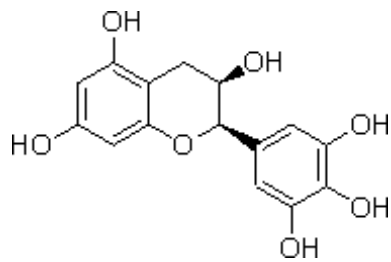

Epigallocatechin  
(EGC)

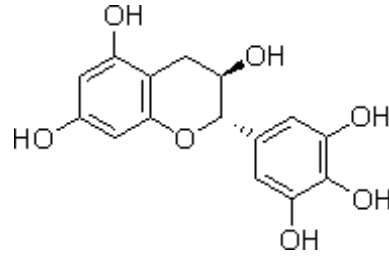

Gallocatechin  
(GC)

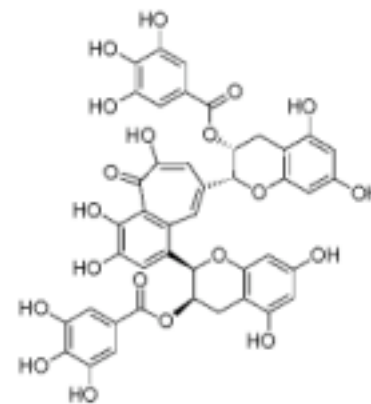

Theaflavin 3,3'-digallate  
(TFDG)
